# Supplementary material for: Measured and Estimated Glomerular Filtration Rate to Evaluate Rapid Progression and Changes over Time in Autosomal Polycystic Kidney Disease: Potential Impact on Therapeutic Decision-Making
Source: MDPI journal article supplement (doi:10.3390/ijms25095036), 2024-05-05
Supplement: s1 [file s1]

Supplementary material for Article:

**Measured and estimated GFR to evaluate rapid progression and GFR changes over time in ADPKD: potential impact on therapeutic decision-making.**

Authors:

Rosa Miquel-Rodríguez <sup>1</sup>, Beatriz González-Toledo <sup>2</sup>, María-Vanesa Pérez-Gómez <sup>2,3,4</sup>, Marian Cobo <sup>1</sup>, Patricia Delgado-Mallén <sup>1</sup>, Sara Estupiñán <sup>1</sup>, Coriolano Cruz-Perera <sup>5</sup>, Laura Díaz-Martín <sup>5</sup>, Federico González Rinne <sup>5</sup>, Alejandra González-Delgado <sup>6</sup>, Armando Torres <sup>1,5,7</sup>, Flavio Gaspari <sup>5</sup>, Domingo Hernández-Marrero <sup>1,5,7</sup>, Alberto Ortiz <sup>2,3,4</sup>, Esteban Porrini <sup>5,7</sup>, Sergio Luis Lima <sup>5, 6, 7</sup>

1 Nephrology Department, Complejo Hospitalario Universitario de Canarias, La Laguna, Spain.

2 Department of Nephrology and Hypertension, IIS-Fundacion Jimenez Diaz UAM, Madrid, Spain.

3 Department of Medicine, RICORS2040, Madrid, Spain.

4 Departamento de Medicina, Facultad de Medicina, Universidad Autónoma de Madrid, Madrid, Spain.

5 Laboratory of Renal Function (LFR), Faculty of Medicine, Complejo Hospitalario Universitario de Canarias, University of La Laguna, La Laguna, Spain.

6 Department of Laboratory Medicine, Complejo Hospitalario Universitario de Canarias, Tenerife, Spain.

7 Instituto de Tecnologías Biomédicas (ITB), Faculty of Medicine, University of La Laguna, La Laguna, Spain

Contents:

Table S1 on page 2

Table S2 on page 6

**Table S1:** mGFR and eGFR decline (creatinine-based) in all cases included for analysis grouped in patients with rapid progression, moderate progression, stable or improvement in GFR over time.

**Table S2:** mGFR and eGFR decline (cystatin-c-based) in all cases included for analysis grouped in patients with rapid progression, moderate progression, stable or improvement in GFR over time.

**Table S1:** mGFR and eGFR decline (creatinine-based) in all cases included for analysis grouped in patients with rapid progression, moderate progression, stable or improvement in GFR over time.

| Patient | Creatinine-based formulas |          |       |       |       |         |       |       |       |
|---------|---------------------------|----------|-------|-------|-------|---------|-------|-------|-------|
|         | mGFR                      | Effersoe | CG    | aMDRD | MCQ   | CKD-EPI | LMRev | FAS   | EKFC  |
| 99      | -35.2                     | -28.9    | -34.4 | -32.4 | -45.7 | -39.2   | -36.2 | -34.2 | -36.6 |
| 135     | -27.0                     | -32.6    | -46.2 | -33.5 | -46.7 | -37.6   | -34.5 | -39.0 | -37.9 |
| 134     | -17.6                     | -9.0     | -18.1 | -9.8  | -5.8  | -11.7   | -8.9  | -10.7 | -11.2 |
| 20      | -16.4                     | 1.9      | -0.7  | 1.7   | 1.0   | 2.4     | 2.4   | 2.1   | 3.2   |
| 64      | -12.1                     | -13.8    | -25.3 | -14.4 | -23.8 | -16.7   | -15.3 | -16.9 | -16.8 |
| 15      | -11.2                     | -4.6     | -8.3  | -5.2  | -8.6  | -6.1    | -6.7  | -5.4  | -5.7  |
| 2       | -10.3                     | -5.2     | -10.3 | -5.7  | -9.3  | -6.6    | -6.5  | -6.3  | -6.8  |
| 9       | -10.2                     | -5.5     | -6.8  | -6.5  | -12.2 | -7.8    | -6.8  | -6.2  | -6.9  |
| 8       | -8.6                      | -6.6     | -6.2  | -7.0  | -10.6 | -8.2    | -6.5  | -7.6  | -8.0  |
| 75      | -8.2                      | -2.1     | -2.6  | -2.7  | -0.1  | -1.8    | -1.8  | -2.5  | -1.9  |
| 107     | -8.2                      | -7.0     | -9.5  | -7.6  | -11.5 | -8.7    | -8.2  | -8.4  | -8.9  |
| 5       | -7.4                      | -5.6     | -8.0  | -5.4  | -5.7  | -6.1    | -5.2  | -7.1  | -6.4  |
| 18      | -7.4                      | 2.9      | -1.9  | 2.8   | 1.2   | 1.9     | 0.9   | 2.7   | 0.8   |
| 113     | -7.4                      | -3.2     | -4.4  | -3.4  | -5.0  | -3.9    | -4.4  | -3.9  | -4.0  |
| 39      | -7.3                      | -4.5     | -6.0  | -4.6  | -6.2  | -5.2    | -4.3  | -5.4  | -5.3  |
| 111     | -7.2                      | -7.3     | -11.6 | -7.3  | -8.0  | -8.1    | -6.1  | -8.9  | -8.3  |
| 42      | -7.0                      | -5.3     | -7.1  | -5.3  | -7.5  | -6.1    | -4.6  | -6.6  | -6.3  |
| 21      | -6.8                      | -2.1     | -2.8  | -2.2  | -4.0  | -2.6    | -2.5  | -2.6  | -2.7  |
| 84      | -6.7                      | -4.7     | -7.8  | -5.8  | -10.4 | -7.1    | -6.6  | -5.6  | -6.0  |
| 87      | -6.5                      | -7.9     | -7.4  | -7.6  | -11.4 | -8.0    | -8.3  | -8.8  | -7.4  |
| 105     | -6.5                      | -2.1     | -2.1  | -2.3  | -3.3  | -2.6    | -1.9  | -2.5  | -2.7  |
| 51      | -6.3                      | 1.8      | 1.1   | 1.1   | -1.0  | -0.1    | 1.4   | 2.0   | -0.5  |
| 25      | -6.2                      | -2.9     | -3.5  | -3.3  | -5.4  | -3.9    | -4.3  | -3.4  | -3.5  |
| 6       | -6.0                      | -2.8     | -2.8  | -2.7  | -2.5  | -2.8    | -2.2  | -3.4  | -2.8  |
| 16      | -6.0                      | -3.1     | -3.6  | -3.8  | -6.8  | -4.6    | -4.3  | -3.6  | -3.9  |
| 66      | -5.9                      | -2.8     | -3.6  | -2.9  | -5.3  | -3.4    | -3.4  | -3.4  | -3.3  |
| 11      | -5.7                      | -2.4     | -3.5  | -3.1  | -1.4  | -4.0    | -2.7  | -2.8  | -3.3  |
| 85      | -5.7                      | -4.7     | -12.2 | -5.8  | -2.4  | -6.8    | -4.7  | -5.7  | -6.3  |
| 28      | -5.4                      | -3.9     | -3.2  | -4.5  | -5.3  | -5.6    | -4.5  | -4.6  | -5.3  |
| 140     | -5.3                      | -18.3    | -19.0 | -17.9 | -24.5 | -19.5   | -17.5 | -21.3 | -18.9 |
| 3       | -5.0                      | -3.6     | -4.7  | -3.6  | -3.7  | -4.0    | -3.1  | -4.5  | -4.2  |
| 13      | -5.0                      | -0.6     | -0.9  | -0.7  | -1.2  | -1.0    | -0.7  | -0.7  | -1.1  |
| 38      | -5.0                      | -5.7     | -6.8  | -5.8  | -10.1 | -6.6    | -6.2  | -6.4  | -6.3  |
| 73      | -4.9                      | -3.0     | -2.8  | -3.2  | -6.3  | -3.8    | -4.4  | -3.5  | -3.6  |
| 129     | -4.9                      | -0.6     | -2.5  | -0.9  | -0.6  | -0.6    | -0.9  | -0.9  | -0.9  |
| 93      | -4.8                      | -1.6     | -2.7  | -1.8  | -3.2  | -2.3    | -2.1  | -2.0  | -2.4  |
| 98      | -4.8                      | -2.9     | -3.2  | -2.7  | -2.6  | -2.7    | -2.1  | -3.4  | -2.7  |
| 52      | -4.7                      | -4.3     | -5.1  | -4.3  | -6.1  | -4.7    | -4.3  | -5.0  | -4.7  |
| 81      | -4.6                      | -2.5     | -2.7  | -4.2  | -5.2  | -4.7    | -1.5  | -2.8  | 0.1   |
| 82      | -4.5                      | -2.2     | -2.9  | -2.4  | -4.7  | -3.0    | -3.1  | -2.6  | -2.9  |

|     |      |      |       |       |       |      |      |       |      |
|-----|------|------|-------|-------|-------|------|------|-------|------|
| 19  | -4.4 | 1.8  | 0.6   | 1.5   | 1.1   | 1.7  | 0.6  | 1.7   | 1.3  |
| 94  | -4.4 | -1.2 | -4.3  | -2.1  | -2.8  | -2.7 | -1.5 | -1.4  | -1.6 |
| 26  | -4.3 | -7.4 | -8.1  | -8.9  | -9.9  | -9.3 | -6.2 | -8.1  | -7.6 |
| 91  | -4.3 | -1.7 | -3.4  | -2.8  | -2.7  | -1.8 | -1.5 | -1.9  | -0.6 |
| 71  | -4.2 | -0.8 | -1.0  | -1.5  | -1.3  | -1.9 | -0.9 | -1.0  | -1.1 |
| 97  | -4.2 | -4.3 | -5.5  | -4.6  | -8.8  | -5.5 | -6.1 | -5.2  | -5.4 |
| 110 | -4.2 | -5.4 | -8.1  | -5.2  | -7.7  | -5.8 | -4.5 | -6.6  | -5.7 |
| 58  | -4.1 | -1.4 | -5.2  | -1.9  | -2.9  | -2.4 | -1.9 | -1.7  | -1.7 |
| 122 | -4.1 | -6.1 | -13.9 | -7.5  | -11.0 | -8.9 | -6.2 | -7.0  | -7.5 |
| 86  | -3.9 | -3.9 | -3.8  | -4.1  | -6.9  | -4.7 | -4.4 | -4.5  | -4.6 |
| 95  | -3.9 | 3.4  | 4.3   | 3.2   | 0.7   | 1.3  | 1.8  | 3.6   | 1.0  |
| 117 | -3.9 | -9.3 | -9.5  | -8.8  | -9.7  | -9.3 | -6.8 | -10.9 | -9.0 |
| 125 | -3.9 | -0.8 | -2.1  | -1.2  | -1.2  | -1.7 | -1.2 | -1.0  | -1.8 |
| 12  | -3.8 | -2.0 | -4.5  | -2.3  | -2.8  | -2.8 | -2.5 | -2.6  | -2.9 |
| 109 | -3.8 | -7.2 | -10.4 | -7.2  | -10.6 | -8.0 | -8.2 | -8.5  | -7.8 |
| 60  | -3.7 | -2.0 | -3.4  | -2.9  | -5.0  | -3.5 | -2.3 | -2.2  | -2.6 |
| 27  | -3.6 | -0.3 | -0.1  | -0.7  | -1.6  | -1.0 | -0.7 | -0.3  | -0.4 |
| 40  | -3.6 | -4.0 | -4.7  | -4.2  | -5.1  | -4.7 | -3.5 | -4.9  | -4.9 |
| 53  | -3.6 | -5.6 | -8.1  | -6.7  | -9.8  | -8.1 | -5.4 | -6.3  | -7.0 |
| 70  | -3.5 | -3.1 | -4.4  | -3.5  | -5.8  | -4.1 | -4.4 | -3.7  | -4.2 |
| 124 | -3.4 | -4.9 | -5.7  | -4.7  | -5.0  | -5.0 | -3.9 | -5.9  | -5.0 |
| 133 | -3.4 | -3.0 | -5.1  | -2.9  | -3.4  | -3.2 | -2.7 | -3.7  | -3.3 |
| 24  | -3.3 | 0.6  | -0.3  | 0.5   | 0.9   | 0.4  | 0.5  | 0.6   | 0.2  |
| 36  | -3.3 | -4.5 | -9.5  | -4.5  | -6.5  | -5.1 | -5.3 | -5.4  | -5.1 |
| 103 | -3.1 | -4.2 | -4.6  | -4.2  | -7.8  | -4.7 | -5.4 | -4.8  | -4.4 |
| 119 | -3.0 | 0.4  | -0.3  | 0.3   | 0.3   | 0.1  | 0.2  | 0.3   | -0.1 |
| 43  | -2.9 | -2.9 | -3.9  | -3.2  | -2.7  | -3.9 | -3.2 | -3.4  | -3.7 |
| 50  | -2.9 | -3.0 | -4.0  | -3.0  | -4.4  | -3.4 | -2.6 | -3.7  | -3.4 |
| 68  | -2.9 | -1.3 | -2.0  | -2.1  | -1.5  | -2.5 | -1.4 | -1.5  | -1.7 |
| 114 | -2.8 | -1.2 | 0.1   | -1.7  | -0.4  | -2.3 | -1.6 | -1.5  | -2.3 |
| 56  | -2.6 | -2.9 | -3.3  | -2.8  | -3.8  | -3.2 | -2.4 | -3.6  | -3.2 |
| 101 | -2.6 | -8.3 | -11.6 | -11.8 | -1.7  | -4.8 | -4.5 | -9.1  | -2.2 |
| 29  | -2.5 | -1.7 | -2.5  | -1.9  | -3.1  | -2.3 | -2.7 | -2.1  | -2.4 |
| 80  | -2.5 | -2.4 | -1.8  | -2.8  | -2.6  | -3.5 | -2.8 | -2.9  | -3.4 |
| 96  | -2.5 | -4.1 | -3.9  | -5.9  | -0.9  | -7.3 | -3.7 | -4.6  | -5.4 |
| 55  | -2.4 | -1.0 | -2.0  | -1.7  | -3.0  | -2.0 | -1.4 | -1.1  | -1.3 |
| 67  | -2.4 | -6.0 | -13.5 | -7.7  | -2.8  | -4.5 | -4.9 | -7.0  | -3.4 |
| 61  | -2.3 | 1.5  | 1.3   | 1.3   | 0.1   | 1.2  | 0.8  | 1.6   | 0.9  |
| 65  | -2.3 | 0.3  | 0.7   | -0.1  | 0.6   | -0.4 | -0.1 | 0.3   | -0.5 |
| 139 | -2.3 | -3.4 | -6.7  | -5.0  | -7.6  | -5.6 | -3.0 | -3.9  | -1.5 |
| 123 | -2.1 | 3.6  | 2.0   | 3.8   | -1.4  | 0.0  | 1.8  | 4.1   | 0.7  |
| 45  | -2.0 | -3.1 | -3.1  | -2.9  | -3.5  | -3.1 | -2.3 | -3.6  | -3.0 |
| 74  | -2.0 | -1.9 | -2.3  | -1.9  | -3.7  | -2.3 | -2.6 | -2.2  | -2.2 |
| 108 | -2.0 | -0.6 | -0.7  | -0.8  | -0.2  | -1.3 | -1.0 | -0.8  | -1.3 |
| 138 | -1.9 | -2.3 | -2.5  | -3.8  | 1.1   | -0.4 | -0.1 | -2.6  | -0.4 |
| 1   | -1.8 | -6.5 | -8.6  | -7.1  | -12.8 | -8.4 | -8.0 | -7.6  | -8.4 |

|     |      |       |       |       |       |       |       |       |       |
|-----|------|-------|-------|-------|-------|-------|-------|-------|-------|
| 4   | -1.8 | -1.8  | -3.2  | -2.0  | -2.8  | -2.3  | -1.7  | -2.2  | -2.5  |
| 34  | -1.7 | -3.2  | -3.6  | -3.3  | -6.1  | -3.8  | -4.2  | -3.8  | -3.7  |
| 23  | -1.6 | -1.0  | -2.7  | -1.4  | -2.2  | -1.8  | -1.5  | -1.4  | -2.0  |
| 63  | -1.6 | -1.6  | -2.4  | -1.8  | -2.7  | -2.3  | -2.1  | -1.9  | -2.3  |
| 131 | -1.6 | 0.2   | -0.7  | 0.1   | -1.5  | -0.1  | -0.5  | 0.0   | -0.4  |
| 46  | -1.5 | -1.6  | -2.9  | -1.6  | -2.5  | -1.8  | -1.5  | -2.0  | -1.9  |
| 54  | -1.5 | 0.1   | -1.6  | -0.1  | -0.3  | -0.3  | -0.4  | -0.1  | -0.5  |
| 116 | -1.4 | -2.6  | -3.2  | -3.3  | -0.7  | -4.2  | -2.8  | -3.2  | -4.2  |
| 92  | -1.3 | -1.5  | -1.6  | -1.6  | -2.3  | -1.8  | -1.6  | -1.8  | -1.8  |
| 47  | -1.2 | -1.9  | -2.0  | -1.9  | -2.2  | -2.1  | -1.6  | -2.3  | -2.2  |
| 83  | -1.1 | -1.1  | -0.7  | -1.5  | -1.9  | -2.1  | -1.6  | -1.4  | -2.2  |
| 78  | -1.0 | -4.4  | -5.0  | -5.1  | -9.1  | -6.2  | -4.9  | -5.1  | -6.2  |
| 30  | -0.8 | -2.3  | -5.0  | -2.1  | -2.6  | -2.3  | -2.0  | -2.9  | -2.4  |
| 104 | -0.6 | 0.0   | -0.5  | -0.2  | -0.3  | -0.3  | -0.2  | -0.1  | -0.4  |
| 121 | -0.6 | 2.0   | 1.3   | 1.9   | 3.4   | 2.0   | 2.0   | 2.2   | 1.6   |
| 14  | -0.5 | -10.2 | -11.9 | -11.2 | -19.8 | -13.1 | -14.1 | -11.9 | -13.1 |
| 49  | -0.4 | -1.9  | -3.2  | -2.5  | -4.1  | -3.1  | -2.3  | -2.4  | -3.3  |
| 37  | -0.3 | 2.0   | 2.0   | 1.9   | 0.5   | 2.1   | 1.6   | 2.2   | 1.7   |
| 112 | -0.3 | -6.7  | -10.2 | -9.2  | -1.1  | -5.4  | -4.9  | -7.7  | -3.8  |
| 118 | -0.3 | -3.5  | -3.2  | -3.3  | -4.5  | -3.4  | -3.4  | -3.9  | -3.2  |
| 88  | -0.2 | -1.9  | -2.6  | -2.0  | -3.4  | -2.3  | -1.8  | -2.3  | -2.3  |
| 90  | -0.2 | 1.4   | 1.5   | 1.2   | 0.6   | 1.1   | 0.8   | 1.5   | 0.8   |
| 72  | -0.1 | -3.3  | -4.3  | -3.8  | -5.4  | -4.7  | -4.1  | -4.0  | -4.6  |
| 33  | 0.1  | -14.2 | -12.6 | -15.1 | -0.6  | -5.3  | -8.2  | -15.6 | -4.9  |
| 62  | 0.1  | 0.5   | 3.4   | -0.2  | 2.2   | -0.5  | 0.6   | 0.7   | 0.4   |
| 100 | 0.1  | -1.2  | -1.9  | -1.4  | -1.8  | -1.6  | -1.2  | -1.5  | -1.7  |
| 136 | 0.1  | -2.0  | -2.0  | -2.0  | -3.5  | -2.3  | -1.4  | -2.3  | -2.2  |
| 7   | 0.2  | -11.9 | -17.6 | -14.8 | -3.0  | -13.0 | -10.2 | -13.7 | -10.9 |
| 10  | 0.2  | -4.0  | -4.8  | -4.9  | -2.1  | -5.3  | -4.0  | -4.9  | -5.3  |
| 48  | 0.2  | -3.2  | -3.7  | -3.9  | -5.8  | -4.8  | -4.1  | -3.9  | -4.7  |
| 59  | 0.2  | -2.3  | -4.5  | -3.1  | -0.3  | -4.0  | -2.2  | -2.7  | -3.0  |
| 77  | 0.2  | -0.2  | -0.1  | -1.1  | -0.3  | -1.2  | 0.1   | -0.2  | -0.1  |
| 17  | 0.4  | -4.9  | -4.8  | -6.1  | -1.4  | -7.7  | -4.8  | -5.6  | -6.3  |
| 41  | 0.7  | -3.3  | -3.6  | -3.9  | -2.9  | -3.3  | -2.8  | -3.7  | -3.2  |
| 76  | 0.7  | 0.1   | 0.2   | -0.6  | -0.6  | -0.6  | 0.1   | 0.1   | 0.1   |
| 32  | 0.9  | -14.2 | -14.2 | -14.1 | -23.2 | -15.4 | -13.6 | -15.6 | -14.1 |
| 22  | 1.1  | 0.9   | 0.1   | 0.8   | 1.1   | 0.7   | 0.8   | 0.9   | 0.5   |
| 69  | 1.2  | -2.1  | -4.7  | -2.6  | -4.5  | -3.2  | -2.6  | -2.6  | -3.4  |
| 79  | 1.2  | -1.2  | -1.8  | -2.2  | -1.0  | -2.7  | -1.3  | -1.4  | -1.6  |
| 44  | 1.4  | 3.1   | 7.0   | 3.0   | -0.1  | 1.2   | 2.0   | 3.6   | 1.8   |
| 89  | 2.0  | 0.1   | -0.8  | -1.1  | -0.4  | -0.4  | 0.8   | 0.1   | 1.5   |
| 35  | 2.3  | 1.3   | 2.1   | 0.9   | 0.4   | 1.2   | 1.5   | 1.5   | 1.2   |
| 106 | 2.5  | 0.6   | 0.8   | 0.2   | 0.0   | 0.0   | 0.1   | 0.5   | -0.3  |
| 115 | 2.5  | -3.9  | -5.8  | -5.2  | -1.1  | -6.4  | -3.6  | -4.5  | -5.0  |
| 130 | 2.5  | 0.5   | -4.0  | -0.3  | -3.4  | -2.5  | 0.3   | 0.4   | -1.0  |
| 120 | 2.8  | -3.5  | -3.8  | -4.9  | 0.6   | -6.1  | -2.9  | -3.9  | -4.6  |

|                           |       |       |       |       |       |       |       |       |       |
|---------------------------|-------|-------|-------|-------|-------|-------|-------|-------|-------|
| 127                       | 2.9   | 3.2   | 4.1   | 2.9   | 4.5   | 3.7   | 3.8   | 3.8   | 4.3   |
| 132                       | 3.0   | 16.8  | 23.0  | 18.4  | 10.8  | 22.2  | 16.1  | 19.5  | 20.7  |
| 102                       | 3.2   | 3.5   | 9.9   | 3.3   | 4.8   | 3.8   | 4.0   | 4.4   | 4.2   |
| 128                       | 3.6   | -8.2  | -10.1 | -10.9 | 0.0   | -6.0  | -6.1  | -9.4  | -4.4  |
| 126                       | 7.0   | 3.4   | 12.6  | 2.9   | 5.5   | 3.4   | 4.6   | 4.2   | 3.8   |
| 57                        | 7.3   | 2.7   | 5.3   | 2.4   | 0.5   | 2.3   | 2.3   | 3.2   | 2.9   |
| 137                       | 7.9   | 0.2   | 0.3   | -0.6  | -1.6  | -0.3  | 0.7   | 0.3   | 1.3   |
| 31                        | 8.6   | -1.0  | -2.1  | -1.2  | -2.2  | -1.6  | -1.5  | -1.3  | -1.7  |
| <b>Counts</b>             |       |       |       |       |       |       |       |       |       |
| $\leq -3$                 | 66    | 61    | 78    | 66    | 66    | 74    | 60    | 68    | 69    |
| $> -3 \text{ \& } < -1$   | 31    | 39    | 28    | 41    | 35    | 33    | 43    | 35    | 35    |
| $\geq -1 \text{ \& } < 1$ | 25    | 23    | 19    | 17    | 28    | 18    | 24    | 20    | 22    |
| $\geq 1$                  | 18    | 17    | 15    | 16    | 11    | 15    | 13    | 17    | 14    |
| <b>%</b>                  |       |       |       |       |       |       |       |       |       |
| $\leq -3$                 | 47.1% | 43.6% | 55.7% | 47.1% | 47.1% | 52.9% | 42.9% | 48.6% | 49.3% |
| $> -3 \text{ \& } < -1$   | 22.1% | 27.9% | 20.0% | 29.3% | 25.0% | 23.6% | 30.7% | 25.0% | 25.0% |
| $\geq -1 \text{ \& } < 1$ | 17.9% | 16.4% | 13.6% | 12.1% | 20.0% | 12.9% | 17.1% | 14.3% | 15.7% |
| $\geq 1$                  | 12.9% | 12.1% | 10.7% | 11.4% | 7.9%  | 10.7% | 9.3%  | 12.1% | 10.0% |

**Table S2:** mGFR and eGFR decline (cystatin-c-based) in all cases included for analysis grouped in patients with rapid progression, moderate progression, stable or improvement in GFR over time.

| Patient | Cystatin-C formulas |          |         |       |       | Cystatin-C & Creatinine formulas |         |         |       |
|---------|---------------------|----------|---------|-------|-------|----------------------------------|---------|---------|-------|
|         | mGFR                | LeBricon | CKD-EPI | FAS   | EKFC  | Ma                               | Stevens | CKD-EPI | FAS   |
| 64      | -24.2               | -25.6    | -26.1   | -28.9 | -24.0 | -26.4                            | -23.3   | -24.8   | -26.2 |
| 20      | -18.0               | -7.9     | -10.3   | -8.8  | -7.3  | -6.3                             | -5.5    | -5.6    | -3.9  |
| 107     | -13.0               | -6.9     | -7.2    | -7.9  | -8.6  | -9.0                             | -8.2    | -8.4    | -8.7  |
| 42      | -10.1               | -8.6     | -8.5    | -9.7  | -7.9  | -6.9                             | -6.0    | -6.6    | -7.2  |
| 105     | -9.7                | -12.5    | -12.4   | -14.0 | -14.4 | -10.6                            | -9.2    | -10.0   | -11.6 |
| 52      | -9.3                | -0.8     | -0.9    | -0.9  | -1.2  | -2.6                             | -2.5    | -2.3    | -2.3  |
| 2       | -9.1                | -10.6    | -13.1   | -11.9 | -14.0 | -8.5                             | -7.3    | -8.5    | -7.5  |
| 74      | -9.0                | -9.2     | -9.4    | -9.9  | -7.1  | -6.5                             | -5.4    | -6.2    | -6.4  |
| 51      | -8.3                | -15.9    | -15.5   | -18.0 | -5.4  | -15.8                            | -13.5   | -10.5   | -10.0 |
| 55      | -8.3                | -17.5    | -26.5   | -19.8 | -22.5 | -13.6                            | -11.4   | -14.3   | -9.4  |
| 21      | -7.5                | -7.7     | -9.1    | -8.7  | -7.6  | -6.0                             | -5.1    | -5.9    | -5.2  |
| 98      | -7.2                | -3.6     | -3.4    | -4.5  | -3.5  | -3.9                             | -3.5    | -3.4    | -4.4  |
| 66      | -6.7                | -10.8    | -11.1   | -12.0 | -9.3  | -8.6                             | -7.3    | -8.2    | -8.4  |
| 53      | -6.6                | -14.7    | -22.2   | -16.5 | -13.3 | -15.4                            | -13.3   | -15.9   | -11.5 |
| 39      | -6.5                | -5.2     | -6.9    | -6.0  | -7.2  | -5.2                             | -4.5    | -5.2    | -4.3  |
| 25      | -6.2                | -6.4     | -8.4    | -7.3  | -8.6  | -6.3                             | -5.5    | -6.2    | -5.1  |
| 60      | -6.2                | -8.3     | -13.2   | -9.4  | -8.4  | -12.9                            | -11.6   | -12.9   | -9.6  |
| 94      | -6.2                | -9.8     | -14.9   | -11.0 | -9.9  | -8.8                             | -7.5    | -9.3    | -6.5  |
| 75      | -5.9                | 4.7      | 2.4     | 4.9   | 1.1   | 3.6                              | 2.9     | 2.0     | 3.0   |
| 129     | -5.8                | -25.6    | -24.2   | -28.4 | -21.4 | -16.3                            | -12.9   | -13.6   | -12.1 |
| 90      | -5.6                | -38.1    | -30.3   | -42.3 | -25.9 | -22.2                            | -17.4   | -16.4   | -14.2 |
| 28      | -5.4                | -7.4     | -9.8    | -8.4  | -7.7  | -8.0                             | -6.9    | -8.1    | -6.5  |
| 70      | -5.4                | -11.0    | -13.3   | -12.4 | -14.1 | -10.5                            | -9.0    | -10.3   | -9.4  |
| 114     | -5.3                | -8.6     | -11.7   | -9.7  | -8.8  | -6.6                             | -5.4    | -7.0    | -5.2  |
| 73      | -5.1                | -17.0    | -18.9   | -18.7 | -14.7 | -12.4                            | -10.2   | -12.1   | -11.3 |
| 125     | -5.1                | -11.5    | -15.1   | -13.1 | -12.0 | -8.6                             | -7.0    | -9.1    | -7.2  |
| 13      | -5.0                | 0.7      | 0.5     | 0.7   | 0.4   | 0.1                              | 0.0     | 0.1     | 0.4   |
| 38      | -5.0                | -8.5     | -9.5    | -9.3  | -9.4  | -9.2                             | -8.0    | -8.7    | -8.6  |
| 87      | -5.0                | -7.5     | -7.4    | -9.2  | -7.1  | -9.4                             | -8.2    | -8.3    | -9.6  |
| 76      | -4.9                | -3.5     | -6.2    | -4.0  | -3.9  | -7.9                             | -7.4    | -5.3    | -5.3  |
| 113     | -4.8                | -6.9     | -8.9    | -7.7  | -8.9  | 0.3                              | 0.9     | -0.5    | 0.3   |
| 16      | -4.4                | -8.0     | -10.8   | -9.0  | -8.2  | -8.2                             | -7.1    | -8.2    | -6.4  |
| 26      | -4.3                | -7.9     | -4.3    | -9.0  | -1.9  | -12.5                            | -11.0   | -8.4    | -8.6  |
| 85      | -4.2                | -10.7    | -12.9   | -12.2 | -10.8 | -10.3                            | -8.8    | -10.7   | -9.8  |
| 84      | -4.0                | -1.6     | -2.2    | -1.8  | -1.6  | -5.8                             | -5.6    | -5.5    | -4.7  |
| 46      | -3.8                | -5.0     | -4.8    | -5.4  | -4.2  | -3.9                             | -3.3    | -3.6    | -4.0  |
| 103     | -3.8                | -8.6     | -8.7    | -9.4  | -6.8  | -8.0                             | -6.8    | -7.4    | -7.8  |
| 27      | -3.6                | -6.7     | -9.8    | -7.6  | -7.1  | -4.8                             | -4.0    | -5.1    | -3.0  |
| 93      | -3.6                | -11.8    | -14.5   | -13.0 | -13.9 | -11.2                            | -9.5    | -11.0   | -9.9  |
| 83      | -3.4                | -4.2     | -3.4    | -5.0  | -5.6  | -4.6                             | -4.0    | -3.7    | -3.5  |

|     |      |       |       |       |       |       |       |       |       |
|-----|------|-------|-------|-------|-------|-------|-------|-------|-------|
| 24  | -3.3 | -6.3  | -5.7  | -7.6  | -4.0  | -3.4  | -2.7  | -3.2  | -3.7  |
| 36  | -3.3 | -10.9 | -11.8 | -11.8 | -12.2 | -9.1  | -7.8  | -8.7  | -8.7  |
| 119 | -3.2 | -0.4  | -0.8  | -0.6  | -1.0  | -0.5  | -0.4  | -0.6  | -0.4  |
| 104 | -2.9 | -3.7  | -4.3  | -4.2  | -5.0  | -3.4  | -2.9  | -3.3  | -3.1  |
| 4   | -2.7 | -3.9  | -4.5  | -4.5  | -5.3  | -3.6  | -3.2  | -3.5  | -3.4  |
| 68  | -2.7 | -12.7 | -17.6 | -14.3 | -13.1 | -10.1 | -8.5  | -10.5 | -7.6  |
| 29  | -2.5 | -7.7  | -9.5  | -8.7  | -9.9  | -5.9  | -5.0  | -5.9  | -5.1  |
| 95  | -2.5 | -0.4  | 0.0   | -0.7  | -0.3  | 0.0   | 0.0   | 0.1   | 0.3   |
| 109 | -2.5 | 3.2   | 4.3   | 3.4   | 3.3   | -2.9  | -3.0  | -2.3  | -3.6  |
| 132 | -2.5 | -7.4  | -10.6 | -8.5  | -8.3  | 8.0   | 8.3   | 6.7   | 7.8   |
| 92  | -2.3 | -18.0 | -20.2 | -19.4 | -18.6 | -10.0 | -7.9  | -9.7  | -8.8  |
| 124 | -2.2 | 2.3   | 2.5   | 2.4   | 2.1   | -1.9  | -2.0  | -1.5  | -2.7  |
| 108 | -2.1 | -5.3  | -6.2  | -5.8  | -4.6  | -4.6  | -3.8  | -4.6  | -4.4  |
| 116 | -2.0 | -10.2 | -13.6 | -11.6 | -10.9 | -9.8  | -8.3  | -10.0 | -8.1  |
| 7   | -1.9 | -1.4  | -3.7  | -1.5  | -1.9  | -12.6 | -12.0 | -9.7  | -9.5  |
| 120 | -1.9 | -20.0 | -24.0 | -22.6 | -21.2 | -18.4 | -15.5 | -17.2 | -13.8 |
| 1   | -1.8 | -1.5  | -2.1  | -1.8  | -2.6  | -5.2  | -4.9  | -4.9  | -4.3  |
| 34  | -1.7 | -4.6  | -4.7  | -5.1  | -3.9  | -4.6  | -4.0  | -4.3  | -4.5  |
| 47  | -1.7 | -8.8  | -9.2  | -9.7  | -9.6  | -5.9  | -4.9  | -5.7  | -5.7  |
| 59  | -1.7 | -59.7 | -35.6 | -67.3 | -25.9 | -39.7 | -31.7 | -25.6 | -22.7 |
| 97  | -1.7 | -14.3 | -15.7 | -16.1 | -13.4 | -13.2 | -11.4 | -12.8 | -12.6 |
| 23  | -1.6 | -9.9  | -14.0 | -11.0 | -8.7  | -8.1  | -6.7  | -8.4  | -6.5  |
| 80  | -1.5 | -2.0  | -2.8  | -2.4  | -2.4  | -4.2  | -3.8  | -4.0  | -3.4  |
| 56  | -1.4 | -4.1  | -3.8  | -4.6  | -3.4  | -2.9  | -2.4  | -2.7  | -3.1  |
| 49  | -1.2 | -3.7  | -5.9  | -4.4  | -4.2  | -4.3  | -3.8  | -4.5  | -3.2  |
| 63  | -1.2 | -2.0  | -2.7  | -2.3  | -2.3  | -3.3  | -2.9  | -3.2  | -2.8  |
| 130 | -1.0 | -12.4 | -18.1 | -13.9 | -11.4 | -11.2 | -9.7  | -11.8 | -8.3  |
| 30  | -0.8 | -4.8  | -3.8  | -5.1  | -3.5  | -3.4  | -3.0  | -3.1  | -4.0  |
| 121 | -0.7 | -1.1  | -1.2  | -1.3  | -1.2  | 0.7   | 0.7   | 0.4   | 0.5   |
| 37  | -0.3 | -4.2  | -6.1  | -5.0  | -5.2  | -2.0  | -1.5  | -2.3  | -1.4  |
| 81  | -0.3 | 2.7   | 4.1   | 3.1   | 2.1   | -0.1  | -0.6  | 0.6   | 0.5   |
| 115 | -0.3 | 0.9   | -0.1  | 1.0   | 0.1   | -2.5  | -2.6  | -2.5  | -1.8  |
| 118 | -0.2 | -3.6  | -3.2  | -4.4  | -3.2  | -4.1  | -3.6  | -3.5  | -4.6  |
| 33  | 0.1  | -10.8 | -12.6 | -11.7 | -9.3  | -16.8 | -14.6 | -10.8 | -13.3 |
| 106 | 0.3  | -6.8  | -10.2 | -7.8  | -7.0  | -5.5  | -4.5  | -5.8  | -4.0  |
| 77  | 0.6  | -11.0 | -9.5  | -12.4 | -10.8 | -10.3 | -8.9  | -7.5  | -6.2  |
| 32  | 0.9  | -8.9  | -10.8 | -9.6  | -9.8  | -14.5 | -12.9 | -13.4 | -12.5 |
| 22  | 1.1  | -2.2  | -2.2  | -0.6  | -2.3  | -1.1  | -0.9  | -1.2  | -0.1  |
| 86  | 1.6  | -1.2  | -1.7  | -1.5  | -2.0  | -3.2  | -2.9  | -3.0  | -2.8  |
| 96  | 1.6  | 5.9   | 6.6   | 6.5   | 5.6   | -6.7  | -7.2  | -5.7  | -3.6  |
| 123 | 1.8  | -17.3 | -9.9  | -19.5 | -8.4  | -11.5 | -9.2  | -7.0  | -7.3  |
| 40  | 1.9  | 2.5   | 2.9   | 2.7   | 2.6   | 0.7   | 0.4   | 0.8   | 0.5   |
| 48  | 2.0  | -7.2  | -10.2 | -8.4  | -8.3  | -8.0  | -6.9  | -8.2  | -6.4  |
| 35  | 2.3  | -2.1  | -3.7  | -2.4  | -2.7  | -1.4  | -1.2  | -1.5  | -0.5  |
| 82  | 2.3  | 3.3   | 4.0   | 3.5   | 2.4   | 0.2   | -0.2  | 0.3   | -0.3  |
| 88  | 2.6  | -8.5  | -9.3  | -9.5  | -7.5  | -6.1  | -5.1  | -5.9  | -5.5  |

|     |      |       |       |       |       |       |       |       |       |
|-----|------|-------|-------|-------|-------|-------|-------|-------|-------|
| 100 | 2.6  | -2.3  | -2.8  | -2.7  | -3.2  | -2.6  | -2.3  | -2.5  | -2.4  |
| 44  | 2.7  | -13.8 | -18.5 | -15.6 | -14.2 | -13.4 | -11.5 | -13.6 | -10.8 |
| 62  | 3.0  | -7.9  | -11.7 | -9.0  | -8.5  | -7.4  | -6.2  | -7.8  | -5.4  |
| 126 | 3.1  | -0.2  | 0.7   | -0.5  | 0.1   | 0.0   | 0.0   | 1.4   | 2.0   |
| 65  | 4.2  | 4.3   | 5.0   | 4.5   | 3.1   | 3.4   | 2.8   | 3.2   | 3.0   |
| 89  | 4.3  | 32.1  | 26.8  | 36.2  | 24.7  | 27.7  | 23.0  | 20.2  | 18.2  |
| 79  | 6.4  | 11.7  | 6.6   | 13.1  | 10.3  | 9.6   | 7.8   | 6.1   | 7.3   |
| 112 | 7.3  | -0.4  | -1.4  | -0.4  | -1.3  | -10.1 | -9.9  | -5.9  | -7.3  |
| 31  | 8.6  | -9.7  | -12.5 | -10.7 | -11.9 | -7.1  | -5.8  | -7.2  | -5.9  |
| 69  | 12.2 | -4.7  | -6.8  | -5.5  | -7.3  | -2.7  | -2.2  | -3.1  | -2.2  |
| 41  | 13.0 | 6.3   | 4.1   | 6.7   | 0.3   | -2.0  | -2.7  | 0.1   | -1.8  |

**Counts**

|                           |    |    |    |    |    |    |    |    |    |
|---------------------------|----|----|----|----|----|----|----|----|----|
| $\leq -3$                 | 43 | 69 | 71 | 69 | 69 | 72 | 69 | 73 | 72 |
| $> -3 \text{ \& } < -1$   | 23 | 10 | 9  | 9  | 12 | 11 | 13 | 9  | 9  |
| $\geq -1 \text{ \& } < 1$ | 11 | 7  | 6  | 7  | 6  | 9  | 10 | 9  | 10 |
| $\geq 1$                  | 20 | 11 | 11 | 12 | 10 | 5  | 5  | 6  | 6  |

**%**

|                           |       |       |       |       |       |       |       |       |       |
|---------------------------|-------|-------|-------|-------|-------|-------|-------|-------|-------|
| $\leq -3$                 | 30.7% | 49.3% | 50.7% | 49.3% | 49.3% | 51.4% | 49.3% | 52.1% | 51.4% |
| $> -3 \text{ \& } < -1$   | 16.4% | 7.1%  | 6.4%  | 6.4%  | 8.6%  | 7.9%  | 9.3%  | 6.4%  | 6.4%  |
| $\geq -1 \text{ \& } < 1$ | 7.9%  | 5.0%  | 4.3%  | 5.0%  | 4.3%  | 6.4%  | 7.1%  | 6.4%  | 7.1%  |
| $\geq 1$                  | 14.3% | 7.9%  | 7.9%  | 8.6%  | 7.1%  | 3.6%  | 3.6%  | 4.3%  | 4.3%  |
